# Supplementary material
Source: PubMed Central journal article supplement (PMC2629221)
Supplement: 0806929106_0806929106SI.pdf [file 0806929106_0806929106SI.pdf]

# Supporting Information

Deigan et al. 10.1073/pnas.0806929106

## Materials and Methods

**Isolation of *Escherichia coli* Protoplasts.** Cell cultures (*E. coli* DH5 $\alpha$ ) were grown to midlog phase ( $A_{600} = 0.8$ ) under shaking in Luria broth, aliquoted (1.5 ml), collected by centrifugation (5 min, 4 °C, 17,000  $\times g$ ), and resuspended in 1 ml of 15 mM Tris (pH 8.0), 450 mM sucrose, and 8 mM EDTA. Lysozyme (400  $\mu$ g) was added and the solution was incubated at 22 °C for 5 min, and on ice for 10 min. Protoplasts were collected by centrifugation (5 min, 4 °C, 5,000  $\times g$ ).

**Recovery of Native RNA.** Protoplast pellets were resuspended in 120  $\mu$ l of 50 mM Hepes (pH 8.0), 200 mM NaCl, 5 mM MgCl<sub>2</sub> and 1.5% (wt/vol) SDS and incubated at 22 °C for 5 min and on ice for 5 min. SDS was precipitated by adding 30  $\mu$ l of 50 mM Hepes (pH 8.0), 1 M potassium acetate, and 5 mM MgCl<sub>2</sub>. The precipitate was collected and discarded by centrifugation (5 min, 4 °C, 17,000  $\times g$ ) and the buffer of the RNA-containing solution exchanged by gel filtration (G-50, 400- $\mu$ l column) preequilibrated in 1 $\times$  folding buffer [50 mM Hepes (pH 8.0), 200 mM potassium acetate (pH 8.0), and 5 mM MgCl<sub>2</sub>]. RNA was eluted in the same solution. The RNA-containing eluent was extracted 3 times with phenol [(pH 8.0):chloroform:isoamyl alcohol; 25:24:1] and 3 times with chloroform; 1.5 ml of bacterial culture yielded  $\approx 25$   $\mu$ g of cellular RNA.

**Recovery of RNA for Sequencing.** Protoplast pellets were lysed by resuspension in 250  $\mu$ l of 10 mM Tris-HCl (pH 8.0), 10 mM NaCl, 1 mM sodium citrate, and 1.5% (wt/vol) SDS, and incubation at 37 °C for 5 min and on ice for 5 min. Saturated NaCl (0.1 ml) was added and the solution was incubated on ice for an additional 10 min. The solution was centrifuged (10 min, 4 °C, 17,000  $\times g$ ) and the precipitate discarded. The resulting solution was extracted as above. RNA was recovered by precipitation with 0.1 vol of sodium acetate (3 M, pH 6.0) and 2.5 vol of ethanol. RNA pellets were washed 3 times with 70% ethanol and resuspended in 50  $\mu$ l of deionized water (final concentration of total RNA  $\approx 1$  mg/ml).

**SHAPE on Total *E. coli* RNA.** RNA ( $\approx 25$   $\mu$ g) in 1 $\times$  folding buffer ( $\approx 500$   $\mu$ l final volume) was divided into 2 equal aliquots, incubated at 37 °C for 30 min, and treated with 1/10 vol of 1-methyl-7-nitro-isatoic anhydride (1M7) (1) in DMSO (1M7, 60 mM) or neat DMSO. Under these conditions,  $\approx 1$  in 300 nt are modified. Reactions were incubated for 3 min and RNA was recovered by ethanol precipitation (see above) and resuspended at 1 mg/ml in 1 $\times$  TE.

**Primer Extension of *E. coli* rRNA.** DNA primers were designed to span the entirety of both 16S and 23S RNA; 4 primers were used to analyze 16S RNA and 10 primers for 23S RNA. Sequences of the 4 DNA primers used in the analysis of 16S RNA, named according to the most 5' nucleotide of the rRNA sequence to which they anneal, were: 559, 5'-CTT TAC GCC CAG TAA TT-3'; 947, 5'-TCG AAT TAA ACC ACA TGC-3'; 1452, 5'-GTA AGC GCC CTC CCG-3'; and 1492, 5'-CCT ACG GTT ACC TTG TTA CGA CTT-3'. Sequences of the ten primers used to analyze 23S RNA were: 367, 5'-GTC CCG CCC TAC TCA TC-3'; 728, 5'-CAA CAT TAC TCG GTT CGG TCC-3'; 1109, 5'-CTT CCG CGC AGG CCG ACT CG-3'; 1514, 5'-GCC TCG TCA TCA CGC CTC-3'; 1832, 5'-CCT TCC GGC ACC GGG CAG G-3'; 1909, 5'-CCT TAG GAC CGT TAT AGT TAC G-3'; 2117, 5'-CTA TAG TAA AGG TTC ACG GGG-3'; 2421, 5'-GTA CCT TTT ATC CGT TGA GC-3'; 2581, 5'-ATG

TGA TGA GCC GAC ATC G-3'; and 2888, 5'-AAG GTT AAG CCT CAC GG-3'. All primers contained 5' amino C6 modifiers (H<sub>2</sub>N-C<sub>6</sub>H<sub>12</sub>-p-DNA). All 23S primers and the 1,492 16S primer were labeled with 5-FAM, 6-JOE, 6-TAMRA, or 5-ROX dyes; other 16S primers were labeled with 6-FAM, VIC, NED and PET dyes. Gel-purified fluorescently labeled DNA primer [2.5 pmol, 5'-labels 6-JOE or 5-FAM (Anaspec); VIC or 6-FAM, (Applied Biosystems)] was added to the appropriate RNA generated above (5.0  $\mu$ g, in 1 $\times$  TE). Typically 6-JOE or VIC was used for the (+) reagent channel and 5- or 6-FAM was used for the (-) reagent channel. The RNA-primer solution was diluted to 6.5  $\mu$ l with water and incubated at 65 °C for 5 min, 45 °C for 5 min, and placed on ice. Primer extension was initiated by addition of enzyme mix [3  $\mu$ l; 250 mM KCl; 167 mM Tris-HCl (pH 8.3), 1.67 mM each deoxynucleotide, 10 mM MgCl<sub>2</sub>; 52 °C, 1 min], SuperScript III (0.5  $\mu$ l, 100 units, Invitrogen), and incubation at 45 °C for 1 min, 52 °C for 7 min, and 65 °C for 5 min. Sequencing reactions were identical, except that they used unmodified nonnative rRNA (4.8  $\mu$ g), the RNA-primer solution was diluted to 6.0  $\mu$ l in deionized water, and 0.5  $\mu$ l of a 10 mM ddNTP solution was added immediately before SuperScript III. Primers used for sequencing were typically labeled with either 6-TAMRA and 5-ROX (Anaspec) or NED and PET (Applied Biosystems) fluorophores. Appropriate reactions [(+) and (-) reagent, 2 sequencing extensions; each extension by using the same primer sequence but labeled with a different fluorophore] were quenched by precipitation with ethanol, washed 3 times with 70% ethanol, dried under vacuum, and redissolved in 10  $\mu$ l of deionized formamide. The cDNA samples were resolved on an Applied Biosystems 3130 capillary electrophoresis DNA sequencer.

**SHAPE Data Processing.** Raw electropherograms of fluorescence intensity versus elution time (Fig. 2B) were analyzed by using ShapeFinder (2, 3). Data processing steps included baseline and mobility shift corrections and a correction for signal decay as a function of primer extension length. Peaks for the (+) and (-) reagent channels were aligned with each other and also with the RNA sequence. The area under each peak was quantified by whole-channel Gaussian integration. After subtracting background, SHAPE reactivities from each primer read were placed on a normalized scale by dividing by the average intensity of the 10% most highly reactive nucleotides, after first excluding highly reactive outliers. Outliers in each primer dataset were identified by using a model-free box plot analysis as reactivities  $> 1.5\times$  the interquartile range (4). For small RNA datasets ( $< \approx 100$  nt), the maximum number of outliers is capped at 5%. Use of model-free statistics is important because SHAPE reactivities do not exhibit a normal distribution. These calculations place all SHAPE reactivities on a scale spanning 0 to  $\approx 2$  (Fig. 2C). Reactivity data for each primer were processed and normalized independently. Final SHAPE data for different, overlapping, primers for the 16S and 23S rRNAs consistently fell on the same scale, without the need for additional normalization.

**SHAPE Analysis of tRNA<sup>Asp</sup>, HCV IRES Domain II, and bI3 Group I Intron P546 Domain.** Data for tRNA<sup>Asp</sup> and the bI3 intron were reported previously (5, 6). Data for the HCV IRES will be reported elsewhere. Accepted target structures for these RNAs were taken from refs. 7–9.



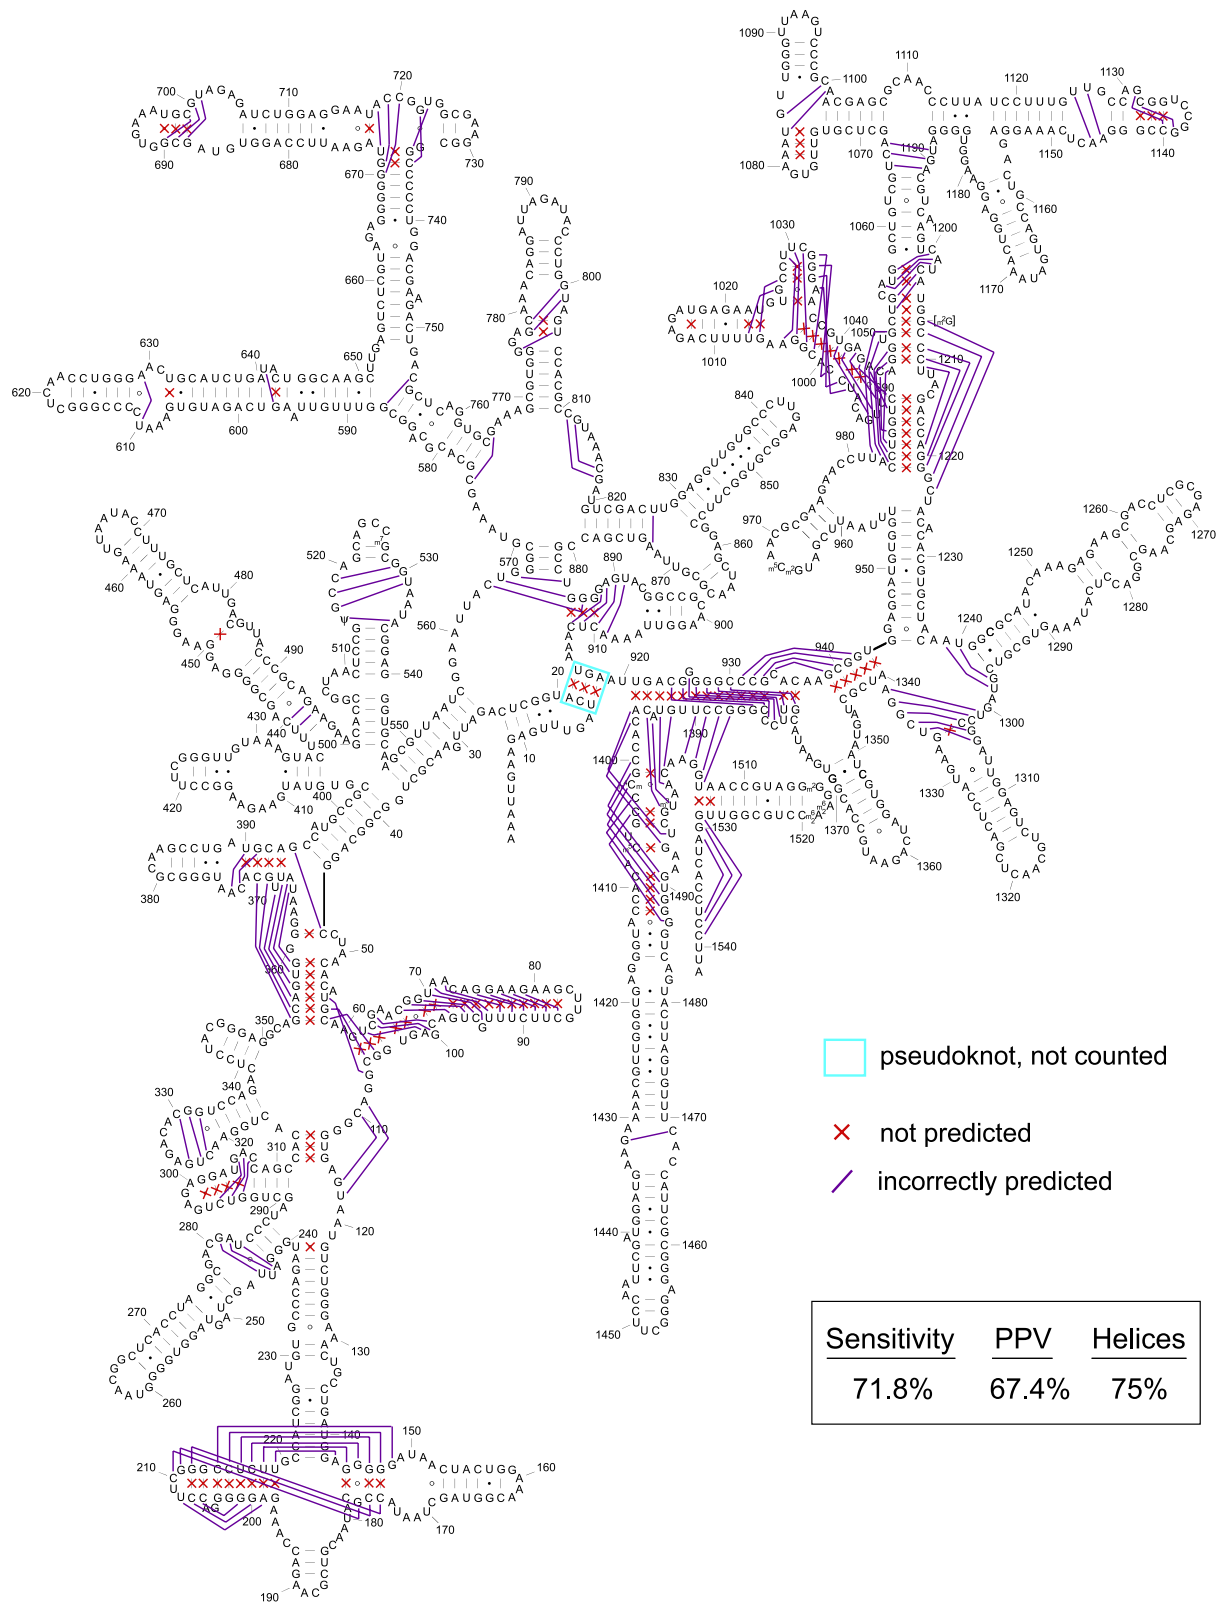

**Fig. S1.** Accuracy of secondary structure prediction for *E. coli* 16S rRNA using conventional chemical reagents. Reagent data included DMS, kethoxal and CMCT (13). Nucleotides judged to show strong or moderate reactivity toward chemical probes (13) were prohibited from forming Watson–Crick base pairs at internal positions in a helix unless they are adjacent to a GU pair. Missed base pairs are represented by red x's; incorrectly predicted base pairs are represented by purple lines.





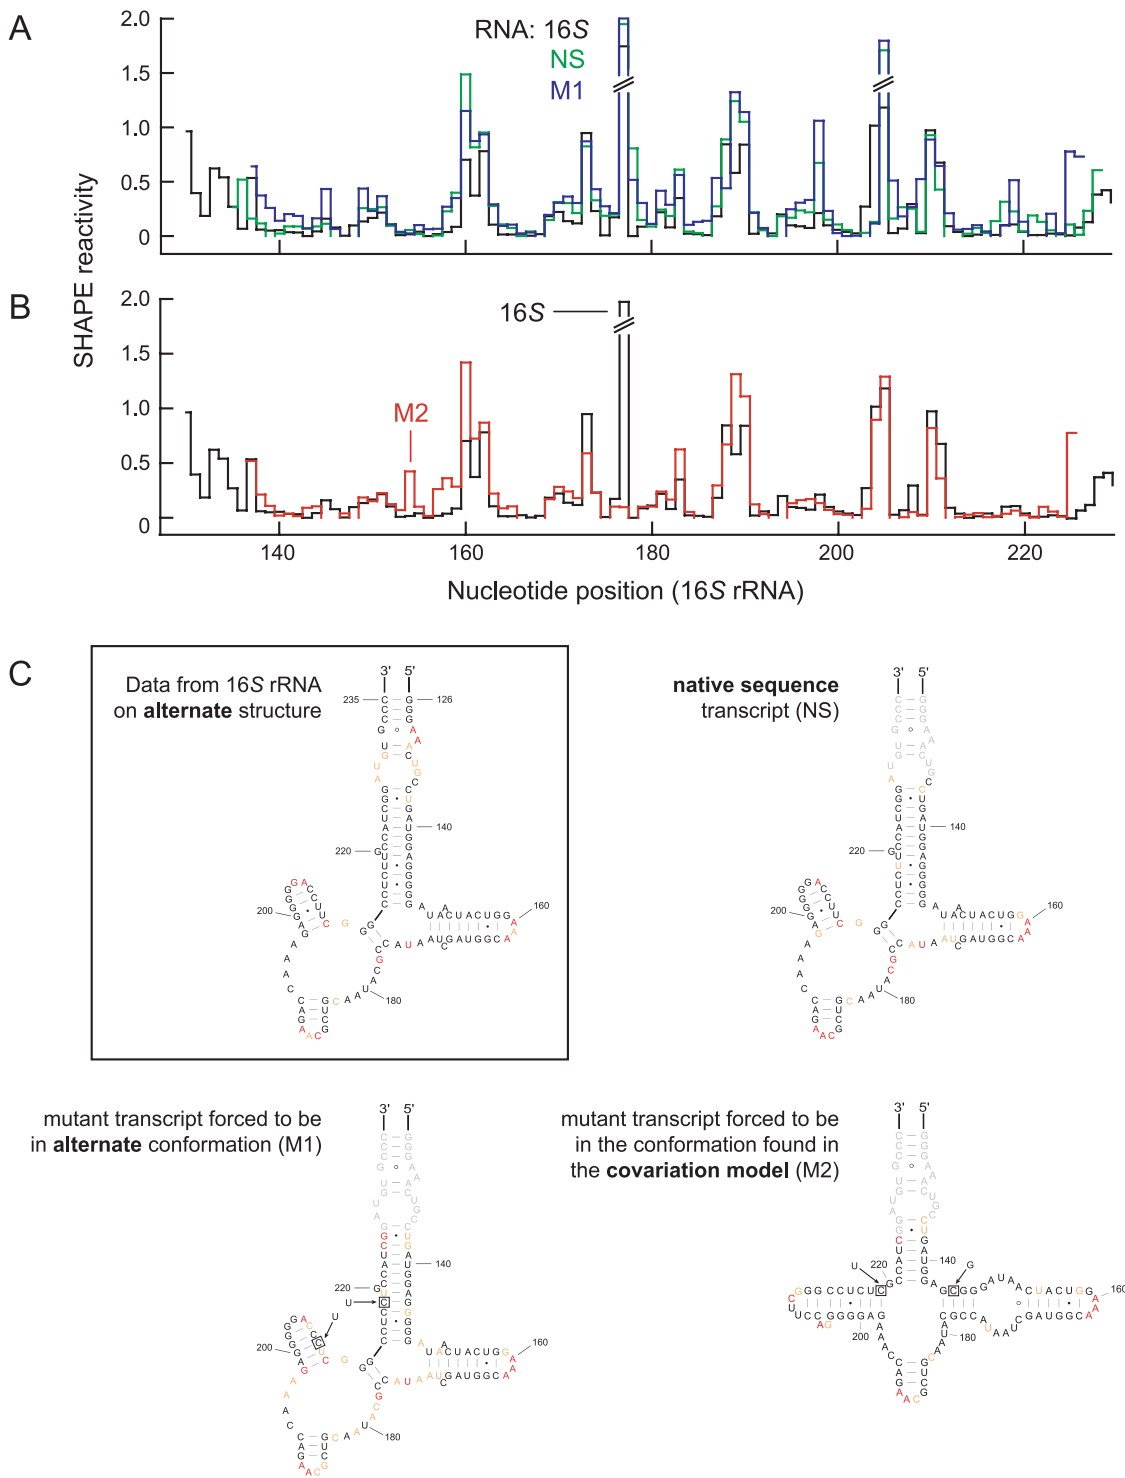

**Fig. S3.** Comparative SHAPE analysis of 16S RNA at the four-helix junction at nucleotides 139–224. Two possible conformations for this region were tested using *in vitro* transcripts and comparison with the structure in the intact 16S rRNA. The *in vitro* transcripts (spanning nucleotides 126–235) were imbedded within 5' and 3' structure cassette sequences (15) to facilitate analysis by SHAPE. Three RNA transcripts were tested: (i) a native sequence RNA (NS), (ii) a mutant that strengthens the proposed alternate structure (M1), and (iii) a mutant that strengthens the conventional structure proposed based on sequence covariation (M2). (A) Integrated SHAPE data for 16S RNA, the NS RNA, and M1. Overall SHAPE reactivities for these three RNAs are similar. (B) Integrated SHAPE data for 16S RNA and M2. There are clear differences in SHAPE reactivities between the two RNAs, most notably at positions 158 and 177. (C) SHAPE data superimposed on proposed alternative and covariation-based secondary structures. Boxes indicate mutations; arrows point from the native sequence nucleotide to the mutated nucleotide. In sum, these experiments strongly support the interpretation that the 3-helix junction in deproteinized 16S rRNA does not fold to the structure derived from covariation analysis but, instead, folds to the alternate structure emphasized by the box in C.
